# Supplementary material for: Tea Consumption and Longitudinal Change in High‐Density Lipoprotein Cholesterol Concentration in Chinese Adults
Source: PubMed Central journal article supplement — J Am Heart Assoc. 2018 Jun 25;7(13):e008814. doi: 10.1161/JAHA.118.008814 (PMC6064891; doi:10.1161/jaha.118.008814), 2018-06-25
Supplement: JAH3-7-e008814-s001.pdf [file JAH3-7-e008814-s001.pdf]

# **SUPPLEMENTAL MATERIAL**

**Table S1. Sensitivity analyses for mean differences in HDL-C concentration, TC/HDL-C ratio and TG/HDL-C ratio change during 6-yr follow-up by tea consumption in 2006<sup>\*, †</sup>**

|                 |                                                                                | Tea consumption         |                        |                        |                        | P for trend |
|-----------------|--------------------------------------------------------------------------------|-------------------------|------------------------|------------------------|------------------------|-------------|
|                 |                                                                                | Never OR<br><once/month | 1-3 times/month        | 1-3 times/week         | ≥4 times/week          |             |
| Change in HDL-C | Excluding smokers                                                              | 0 (Ref)                 | 0.021<br>(0.017,0.025) | 0.019<br>(0.014,0.023) | 0.013<br>(0.010,0.017) | <0.0001     |
|                 | Excluding alcohol consumers                                                    | 0 (Ref)                 | 0.020<br>(0.014,0.025) | 0.014<br>(0.009,0.019) | 0.013<br>(0.010,0.017) | <0.0001     |
|                 | Excluding participants with diabetes                                           | 0 (Ref)                 | 0.010<br>(0.007,0.013) | 0.009<br>(0.006,0.012) | 0.010<br>(0.007,0.013) | <0.0001     |
|                 | Excluding participants with hypertension                                       | 0 (Ref)                 | 0.009<br>(0.005,0.012) | 0.006<br>(0.003,0.010) | 0.008<br>(0.005,0.011) | <0.0001     |
|                 | Excluding participants with BMI≥24 kg/m <sup>2</sup>                           | 0 (Ref)                 | 0.008<br>(0.007,0.014) | 0.008<br>(0.006,0.012) | 0.006<br>(0.006,0.011) | <0.0001     |
|                 | Excluding participants older than 60 y                                         | 0 (Ref)                 | 0.010<br>(0.007,0.014) | 0.008<br>(0.005,0.011) | 0.009<br>(0.006,0.013) | <0.0001     |
|                 | Excluding participants with CRP≥3mg/L                                          | 0 (Ref)                 | 0.011<br>(0.007,0.014) | 0.009<br>(0.006,0.012) | 0.010<br>(0.007,0.013) | <0.0001     |
|                 | Excluding participants with higher waist circumference (men>90cm, women >85cm) | 0 (Ref)                 | 0.010<br>(0.006,0.014) | 0.009<br>(0.005,0.012) | 0.009<br>(0.006,0.012) | <0.0001     |
|                 | Excluding                                                                      | 0 (Ref)                 | 0.011                  | 0.009                  | 0.010                  | <0.0001     |

|                                |                                                                                               |         |                          |                         |                            |      |
|--------------------------------|-----------------------------------------------------------------------------------------------|---------|--------------------------|-------------------------|----------------------------|------|
| Change in<br>TG/HDL-C<br>ratio | participants with<br>severe fatty liver                                                       |         | (0.008,0.014)            | (0.007,0.012)           | (0.007,0.013)              |      |
|                                | Excluding<br>smokers                                                                          | 0 (Ref) | -0.009<br>(-0.027,0.009) | 0.002<br>(-0.041,0.045) | -0.021<br>(-0.037, -0.006) | 0.08 |
|                                | Excluding<br>alcohol<br>consumers                                                             | 0 (Ref) | -0.008<br>(-0.031,0.015) | 0.011<br>(-0.041,0.063) | -0.009<br>(-0.040,0.023)   | 0.73 |
|                                | Excluding<br>participants with<br>diabetes                                                    | 0 (Ref) | 0.003<br>(-0.011,0.016)  | 0.010<br>(-0.015,0.035) | -0.024<br>(-0.036, -0.013) | 0.01 |
|                                | Excluding<br>participants with<br>hypertension                                                | 0 (Ref) | 0.004<br>(-0.010,0.017)  | 0.011<br>(-0.014,0.035) | -0.013<br>(-0.035,0.009)   | 0.52 |
|                                | Excluding<br>participants with<br>BMI $\geq$ 24 kg/m <sup>2</sup>                             | 0 (Ref) | 0.001<br>(-0.014,0.016)  | 0.003<br>(-0.020,0.025) | -0.011<br>(-0.028, 0.006)  | 0.36 |
|                                | Excluding<br>participants older<br>than 60 y                                                  | 0 (Ref) | 0.0006<br>(-0.014,0.015) | 0.013<br>(-0.014,0.041) | -0.019<br>(-0.033, -0.004) | 0.17 |
|                                | Excluding<br>participants with<br>CRP $\geq$ 3mg/L                                            | 0 (Ref) | 0.005<br>(-0.008,0.019)  | 0.011<br>(-0.011,0.034) | -0.014<br>(-0.030,0.002)   | 0.33 |
|                                | Excluding<br>participants with<br>higher waist<br>circumference<br>(men>90cm,<br>women >85cm) | 0 (Ref) | 0.005<br>(-0.008,0.019)  | 0.004<br>(-0.021,0.030) | -0.010<br>(-0.025,0.005)   | 0.45 |
|                                | Excluding<br>participants with<br>severe fatty liver                                          | 0 (Ref) | -0.001<br>(-0.013,0.011) | 0.010<br>(-0.014,0.034) | -0.016<br>(-0.030, -0.001) | 0.16 |

|                                |                                                                                               |         |                            |                            |                            |       |
|--------------------------------|-----------------------------------------------------------------------------------------------|---------|----------------------------|----------------------------|----------------------------|-------|
| Change in<br>TC/HDL-C<br>ratio | Excluding<br>smokers                                                                          | 0 (Ref) | 0.005<br>(-0.076,0.084)    | -0.024<br>(-0.044, -0.005) | -0.025<br>(-0.038, -0.013) | 0.006 |
|                                | Excluding<br>alcohol<br>consumers                                                             | 0 (Ref) | 0.027<br>(-0.083,0.137)    | -0.009<br>(-0.034,0.015)   | -0.019<br>(-0.038, -0.001) | 0.37  |
|                                | Excluding<br>participants with<br>diabetes                                                    | 0 (Ref) | 0.004<br>(-0.030,0.037)    | -0.008<br>(-0.021,0.006)   | -0.015<br>(-0.024, -0.006) | 0.007 |
|                                | Excluding<br>participants with<br>hypertension                                                | 0 (Ref) | -0.009<br>(-0.020,0.002)   | 0.001<br>(-0.014,0.016)    | 0.0003<br>(-0.013,0.013)   | 0.91  |
|                                | Excluding<br>participants with<br>BMI $\geq$ 24 kg/m <sup>2</sup>                             | 0 (Ref) | -0.013<br>(-0.025,0.0001)  | -0.015<br>(-0.029, -0.002) | -0.001<br>(-0.017, 0.015)  | 0.32  |
|                                | Excluding<br>participants older<br>than 60 y                                                  | 0 (Ref) | 0.006<br>(-0.030,0.042)    | -0.002<br>(-0.016,0.012)   | -0.017<br>(-0.027, -0.008) | 0.02  |
|                                | Excluding<br>participants with<br>CRP $\geq$ 3mg/L                                            | 0 (Ref) | -0.013<br>(-0.023, -0.002) | -0.008<br>(-0.021,0.005)   | -0.012<br>(-0.022, -0.002) | 0.008 |
|                                | Excluding<br>participants with<br>higher waist<br>circumference<br>(men>90cm,<br>women >85cm) | 0 (Ref) | -0.012<br>(-0.022, -0.001) | -0.004<br>(-0.017, 0.009)  | -0.007<br>(-0.019, 0.005)  | 0.13  |
|                                | Excluding<br>participants with<br>severe fatty liver                                          | 0 (Ref) | 0.002<br>(-0.031,0.034)    | -0.008<br>(-0.021,0.005)   | -0.014<br>(-0.024, -0.005) | 0.008 |

\* All models adjusted for age, sex(men or women ), education(illiterate, middle, or college), income(<600, 600-1000,

or >1000RMB/mo), occupation (white collar, blue collar, or coal miner), physical activity (inactive, moderate, or active), smoking status (never, past, or current), alcohol drinking status (never, past, or current), blood glucose status (normoglycemia, prediabetes, or diabetes), blood pressure status (normotensive, prehypertension, or hypertension), body mass index (in kg/m<sup>2</sup>; <24, 24-27.9, 28-29.9, or ≥30), waist circumference(<85 or ≥85 cm for women, and <90 or ≥90 cm for men), C-reactive protein (<1, 1-2.9, or ≥3mg/l), fatty liver(none, mild, or severe). Models were further adjusted for TG and LDL-C for change in HDL-C, for TG for change in TC/HDL-C ratio, for LDL-C for change in TG/HDL ratio. Generalized estimating equation models were used to model change rates and to test differences in change rates compared with the never or <once/month group.

† HDL-C, high-density lipoprotein cholesterol; LDL-C, low density lipoprotein cholesterol; TC, total cholesterol; TG, triglyceride.

**Table S2. Longitudinal change in HDL-C (mmol/l/year) by tea consumption in 2006 using propensity score.**

| Models                                 | Tea consumption |                             |                         | P for trend             |                     |
|----------------------------------------|-----------------|-----------------------------|-------------------------|-------------------------|---------------------|
|                                        | Never OR        | <once/month 1-3 times/month | 1-3 times/week          |                         | $\geq 4$ times/week |
| Propensity score weighting             | 0 (Ref)         | 0.013<br>(0.007, 0.019)     | 0.012<br>(0.006, 0.018) | 0.014<br>(0.009, 0.020) | <0.0001             |
| Adjusting Propensity score             | 0 (Ref)         | 0.010<br>(0.007, 0.013)     | 0.008<br>(0.006, 0.011) | 0.010<br>(0.008, 0.013) | <0.0001             |
| Stratification on the propensity score | 0 (Ref)         | 0.010<br>(0.007, 0.013)     | 0.008<br>(0.006, 0.011) | 0.010<br>(0.008, 0.013) | <0.0001             |
